# Supplementary material
Source: Springer Nature journal article supplement (https://www.springermedizin.de/resource/supplementary/13030_2010_74_MOESM8_ESM.pdf/9644686)

Fig. 8

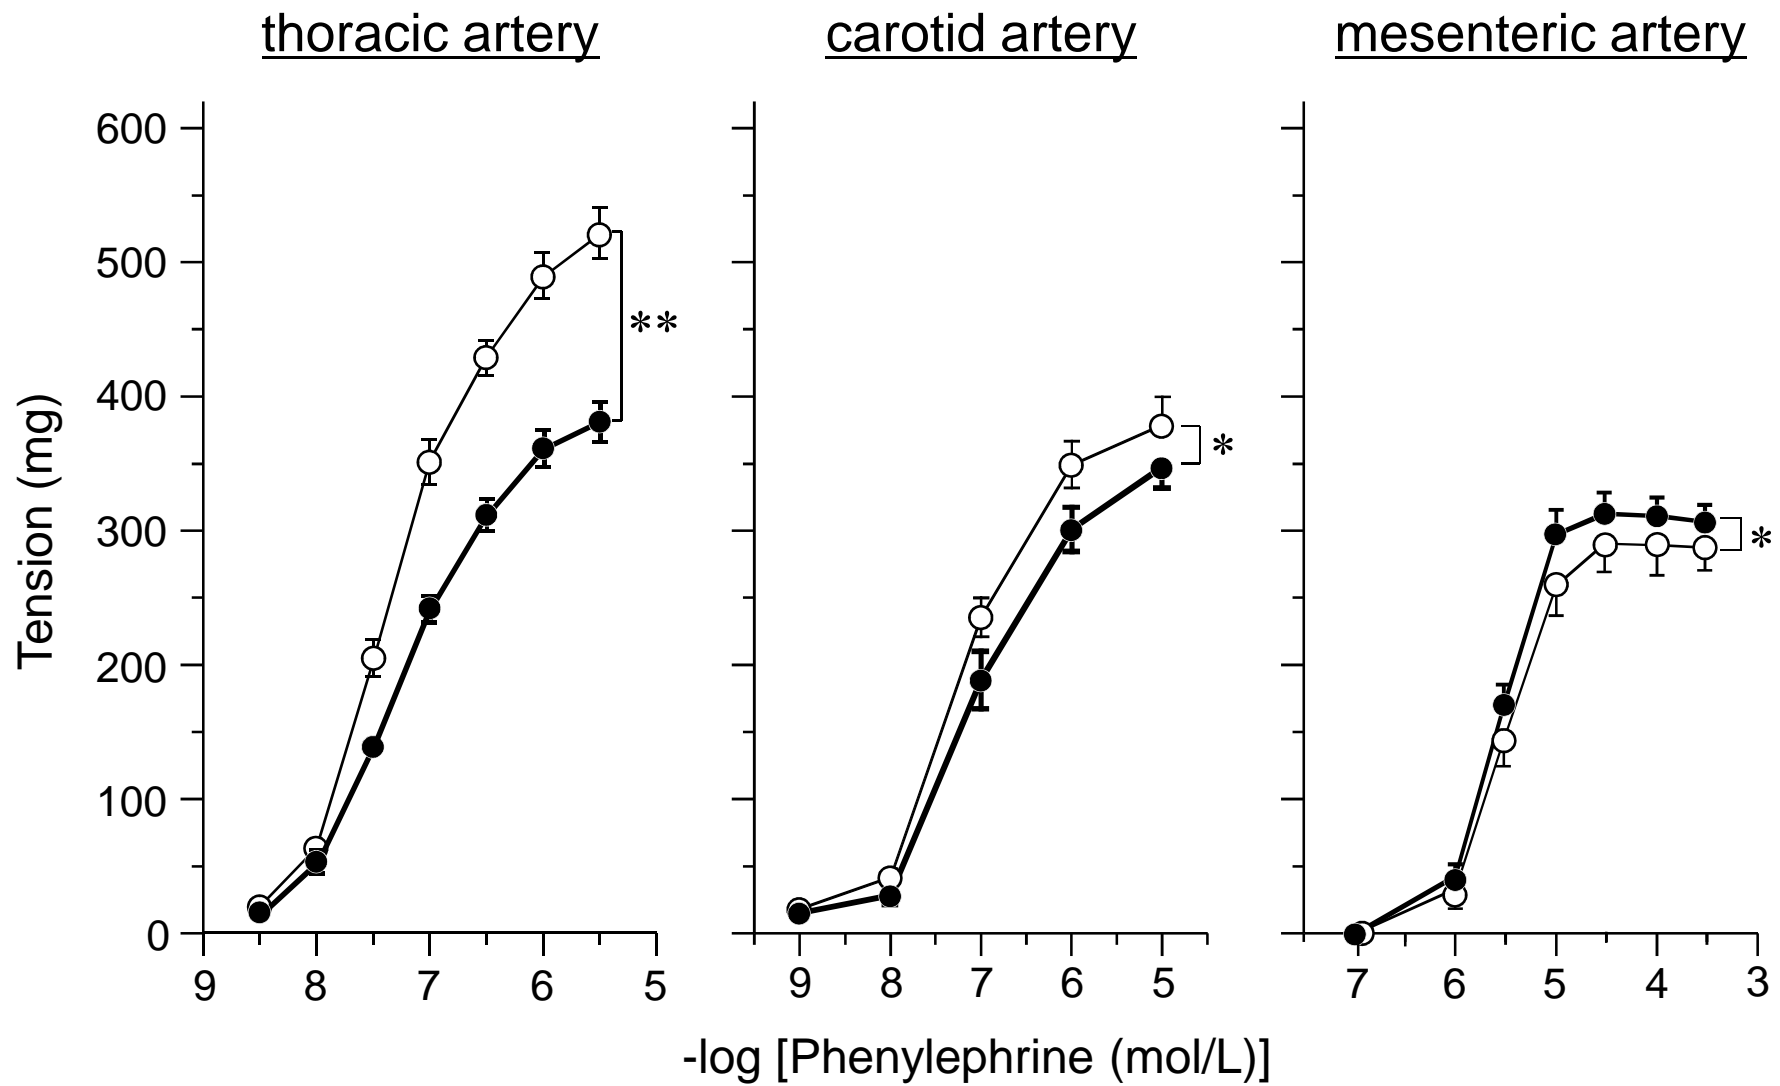

Supplement: MOESM8 [file 9644686]
